# Supplementary material
Source: publisher figshare collection journal article supplement (https://acs.figshare.com/ndownloader/files/4775698)

# Supporting Information

## **Radical Reactions with 2-Bromobenzylidene Group, a Protecting/Radical-Translocating Group for the 1,6-Radical Hydrogen Transfer Reaction**

*Natsumi Sakaguchi, Shinpei Hirano, Akira Matsuda, and Satoshi Shuto<sup>\*a</sup>*

Graduate School of Pharmaceutical Sciences, Hokkaido University,

Kita-12, Nishi-6, Kita-ku, Sapporo 060-0812, Japan.

[shu@pharm.hokudai.ac.jp](mailto:shu@pharm.hokudai.ac.jp)

**Contents:** Experimental procedures and spectroscopic data of all new compounds, NOE and/or NOESY data of key compounds (Figure S1), <sup>1</sup>H, <sup>13</sup>C, and <sup>1</sup>H-2D NMR spectra of the radical reaction substrates **4** and **9**, and the products **5b**, **10**, and **11** (13 pages).

## Experimental Section

Chemical shifts are reported in ppm downfield from tetramethylsilane, and coupling constants are given in Hz. All of the  $^1\text{H}$  NMR assignments described were in agreement with COSY spectra. Thin-layer chromatography was done on Merck coated plate 60F<sub>254</sub>. Silica gel chromatography was done on Merck silica gel 5715. Reactions were carried out under an argon atmosphere.

**2,3-*O*-Endo-(2-bromobenzylidene)-D-ribose (2).** A mixture of D-ribose (6.00 g, 40.0 mmol), 2-Br-PhCH(OEt)<sub>2</sub> (18.5 mL, 91.7 mmol), and TsOH (unhydrous, 2.07 g, 12 mmol) in DMF (130 mL) was stirred at room temperature for 14 h, and then Et<sub>3</sub>N (5 mL) was added. The solvent was evaporated, and the residue was purified by silica gel column chromatography (AcOEt/hexane, 1:3-1:1) to give **2** (5.35 g, 42%,  $\alpha:\beta = 1:19$ ) as a white solid:  $^1\text{H}$  NMR (270 MHz, CDCl<sub>3</sub>); for  $\beta$ -anomer  $\delta$  7.73-7.23 (m, 4 H, aromatic), 6.11 (s, 1 H, benzyl), 5.59 (s, 1 H, H-1), 4.98 (d, 1 H, H-3,  $J_{3,2} = 6.6$  Hz), 4.73 (d, 1 H, H-2,  $J_{2,3} = 5.9$  Hz), 4.60 (s, 1 H, H-4), 3.82 (m, 2 H, H-5a,5b), 3.03 (br s, 1 H, 5-OH-5); HRMS (FAB) calcd for C<sub>12</sub>H<sub>18</sub><sup>79</sup>BrNaO<sub>5</sub> 338.9844, found 338.9843 (MNa<sup>+</sup>).

**2,3-*O*-Endo-(2-bromobenzylidene)-5-*O*-(*tert*-butyldiphenylsilyl)-D-ribose (3).** A mixture of **2** (12 g, 38 mmol), Et<sub>3</sub>N (6.4 mL, 46 mmol), DMAP (4.7 g, 38 mmol), and TBDPSCl (15 mL, 57 mmol) in CH<sub>2</sub>Cl<sub>2</sub> (380 mL) was stirred at room temperature for 4 h, and the MeOH was added. The solvent was evaporated, and the residue was partitioned between AcOEt and H<sub>2</sub>O. The organic layer was washed with brine, dried (Na<sub>2</sub>SO<sub>4</sub>) and evaporated. The residue was purified by silica gel column chromatography (AcOEt/hexane, 1:20-1:5) to give **3** (16 g, 76%,  $\alpha:\beta = 1:5$ ) as an oil:  $^1\text{H}$  NMR (270 MHz, CDCl<sub>3</sub>) for  $\beta$ -anomer  $\delta$  7.73-7.21 (m, 14 H, aromatic), 6.13 (s, 1 H, benzyl), 5.52 (d, 1 H, H-1,  $J_{1,\text{OH}} = 10.6$  Hz), 4.88 (d, 1 H,  $J_{3,2} = 5.9$  Hz), 4.77 (d, 1 H, H-2,  $J_{2,3} = 5.9$  Hz), 4.71 (d, 1 H, OH,  $J_{\text{OH},1} = 11.2$  Hz), 4.46 (m, 1 H, H-4), 3.83 (dd, 1 H, H-5a,  $J_{5a,4} = 2.6$ ,  $J_{5a,5b} = 11.2$  Hz), 3.70 (dd, 1 H, H-5b,  $J_{5b,4} = 2.6$  Hz,  $J_{5b,5a} = 11.2$  Hz), 1.08 (s, 9 H, *t*-Bu); HRMS (FAB) calcd for C<sub>28</sub>H<sub>31</sub><sup>79</sup>BrNaO<sub>5</sub>Si 577.1022, found 577.1018 (MNa<sup>+</sup>).

**2,3-*O*-Endo-(2-bromobenzylidene)-5-*O*-(*tert*-butyldiphenylsilyl)-1-*O*-(3-fluorobenzoyl)- $\beta$ -D-ribose (4).** To a solution of **3** (496 mg, 0.89 mmol), PPh<sub>3</sub> (703 mg, 2.7 mmol), and 3-F-PhCO<sub>2</sub>H (250 mg, 1.8 mmol) was added a solution of DIAD (352  $\mu$ L, 1.8 mmol) in CH<sub>2</sub>Cl<sub>2</sub> (5 mL) slowly at 0 °C, and the resulting mixture was stirred at room temperature for 1 h. After addition of MeOH, the solvent was evaporated, and the residue was purified by short silica gel column chromatography (AcOEt/hexane, 1:30) to give crude **4**, of which  $\alpha/\beta$  ratio was 97:3 from the  $^1\text{H}$  NMR spectrum. After further purification by silica gel flash column chromatography (Et<sub>2</sub>O/hexane, 1:33), the  $\beta$ -anomer **4** (452 mg, 75%) was obtained as an oil in a pure form, along with a  $\alpha/\beta$ -mixture ( $\alpha:\beta = 4:1$ , 100 mg, 17%):  $^1\text{H}$  NMR (400 MHz, CDCl<sub>3</sub>)  $\delta$  7.75-7.00 (m, 18 H, aromatic), 6.61 (d, 1 H, H-1,  $J_{1,2} = 4.6$  Hz), 6.33 (s, 1 H, benzyl), 5.15 (dd, 1 H, H-2,  $J_{2,3} = 6.6$ ,  $J_{2,1} = 4.6$  Hz), 5.03 (dd, 1 H, H-3,  $J_{3,2} = 6.6$ ,  $J_{3,4} = 2.0$  Hz), 4.64 (m, 1 H, H-4,  $J_{3,4} = 2.0$  Hz), 3.91 (dd, 1 H, H-5a,  $J_{5a,4} = 2.6$  Hz,  $J_{5a,5b} = 11.2$  Hz), 3.83 (dd, 1 H, H-5b,  $J_{5b,4} = 2.6$  Hz,  $J_{5b,5a} = 11.2$  Hz), 1.10 (s, 9 H,

*t*-Bu);  $^{13}\text{C}$  NMR (100 MHz,  $\text{CDCl}_3$ ); 19.4, 27.0, 64.5, 80.6, 82.7, 83.0, 97.9, 106.3, 116.5, 116.7, 119.9, 120.1, 122.8, 125.6, 125.6, 127.1, 127.8, 128.4, 129.6, 129.7, 129.8, 129.9, 130.8, 132.3, 132.5, 132.7, 134.5, 135.4, 135.5, 160.9, 163.8; HRMS (FAB) calcd for  $\text{C}_{35}\text{H}_{34}^{79}\text{BrFNaO}_6\text{Si}$  699.1190, found 699.1187 ( $\text{MNa}^+$ ).

**2,3-*O*-Endo-(2-bromobenzyldiene)-1-*O*-(3-fluorobenzoyl)- $\beta$ -D-ribose (8).** A mixture of **4** (456 mg, 0.67 mmol) and  $\text{NH}_4\text{F}$  (1.4 g, 37 mmol) in EtOH/MeOH (1:1, 14 mL) was stirred at room temperature for 2 days. After addition of AcOEt, the resulting mixture was filtered through Celite, and the filtrate was evaporated. The residue was purified by silica gel column chromatography (AcOEt/hexane, 1:3) to give **8** (262 mg, 89%) as an oil:  $^1\text{H}$  NMR (270 MHz,  $\text{CDCl}_3$ )  $\delta$  7.75–6.99 (m, 8 H, aromatic), 6.56 (d, 1 H, H-1,  $J_{1,2}$  = 4.6 Hz), 6.35 (s, 1 H, benzyldiene), 5.07 (dd, 1 H, H-2,  $J_{2,3}$  = 7.3,  $J_{2,1}$  = 4.6 Hz), 4.97 (dd, 1 H, H-3,  $J_{3,2}$  = 7.3,  $J_{3,4}$  = 3.3 Hz), 4.64 (m, 1 H, H-4), 3.96 (dd, 1 H, H-5a,  $J_{5a,4}$  = 2.6 Hz,  $J_{5a,5b}$  = 12.5 Hz), 3.84 (dd, 1 H, H-5b,  $J_{5b,4}$  = 2.6 Hz,  $J_{5b,5a}$  = 12.5 Hz), 2.05 (br s, 1 H, OH).

**2,3-*O*-Endo-(2-bromobenzyldiene)-5-*O*-(diphenylvinylsilyl)-1-*O*-(3-fluorobenzoyl)- $\beta$ -D-ribose (9).** A mixture of **8** (1.3 g, 3.0 mmol), DMAP (74 mg, 0.61 mmol, 0.2 eq.),  $\text{Et}_3\text{N}$  (845  $\mu\text{L}$ , 6.1 mmol), and diphenylvinylsilyl chloride (1.34 mL, 6.1 mmol) in toluene (30 mL) was stirred at room temperature for 1.5 h, and then MeOH was added. The resulting mixture was partitioned between AcOEt and  $\text{H}_2\text{O}$ , and the organic layer was washed with brine, dried ( $\text{Na}_2\text{SO}_4$ ) and evaporated. The residue was purified by silica gel column chromatography (AcOEt/hexane, 1:30) to give **9** (1.9 g, 98%) as an oil:  $^1\text{H}$  NMR (270 MHz,  $\text{CDCl}_3$ )  $\delta$  7.72–6.97 (m, 18 H, aromatic), 6.52 (dd, 1 H,  $\text{CH}_2=\text{CH}-$ ,  $J$  = 15.1 Hz,  $J$  = 19.8 Hz), 6.49 (d, 1 H, H-1,  $J_{1,2}$  = 4.0 Hz), 6.34 (dd, 1 H,  $\text{CH}_2=\text{CH}-$ ,  $J$  = 15.1 Hz,  $J$  = 4.0 Hz), 6.29 (s, 1 H, benzyldiene), 5.95 (dd, 1 H,  $\text{CH}_2=\text{CH}-$ ,  $J$  = 19.8 Hz,  $J$  = 4.0 Hz), 5.00 (m, 2 H, H-2,3), 4.65 (m, 1 H, H-4), 4.03 (dd, 1 H, H-5a,  $J_{5a,4}$  = 2.6 Hz,  $J_{5a,5b}$  = 11.2 Hz), 3.95 (dd, 1 H, H-5b,  $J_{5b,4}$  = 2.6 Hz,  $J_{5b,5a}$  = 11.2 Hz);  $^{13}\text{C}$  NMR (100 MHz,  $\text{CDCl}_3$ ); 64.5, 80.9, 82.8, 83.3, 98.0, 106.7, 116.8, 117.1, 120.2, 120.4, 123.6, 125.9, 127.3, 128.1, 128.3, 128.5, 128.7, 129.9, 130.0, 131.1, 132.0, 132.1, 133.5, 133.5, 134.7, 134.8, 135.1, 135.1, 138.1, 161.2, 163.6, 164.1; HRMS (FAB) calcd for  $\text{C}_{33}\text{H}_{28}\text{BrFO}_6\text{SiNa}$  669.0720, found 669.0714 ( $\text{MNa}^+$ ).

**Deuterium-Labeling Reaction with the Substrate 4.** A mixture of **4** (61 mg, 0.090 mmol)  $\text{Bu}_3\text{SnD}$  (73  $\mu\text{L}$ , 0.21 mmol), and AIBN (9 mg, 0.054 mmol) was refluxed under argon for 1 h. The solvent was evaporated, and the residue was purified by column chromatography with silica gel containing 20% of KF (AcOEt/hexane, 1:1) to give a mixture of the reaction products as an oil. The mixture was further purified by silica gel column chromatography (AcOEt/hexane, 1:30 then 1:20) to give **5b** (19 mg) as an oil and a mixture of **5a**, **6** and **7** (24 mg) as an oil. The ratio of **5a** and **6** to **7** was determined by ESI-MS, and the ratio of **5a** and **6** was determined by  $^2\text{H}$  NMR. Based on these ratios, yields of **5a**, **6** and **7** were calculated, respectively.

**2,3-*O*-Endo-(benzyldiene)-5-*O*-(*tert*-butyldiphenylsilyl)-1-*O*-(3-fluorobenzoyl)- $\beta$ -D-[4- $^2\text{H}$ ]ribos**

**e (5a).** <sup>1</sup>H NMR (400 MHz, CDCl<sub>3</sub>);  $\delta$  7.70-7.14 (m, 19 H, aromatic), 6.58 (d, 1 H, H-1,  $J_{1,2}$  = 4.5 Hz), 6.07 (s, 1 H, benzyl), 5.11 (dd, 1 H, H-2,  $J_{2,3}$  = 6.7 Hz,  $J_{2,1}$  = 4.5 Hz), 5.00 (d, 1 H, H-3,  $J_{3,2}$  = 6.7 Hz), 3.90 (d, 1 H, H-5a,  $J_{5a,5b}$  = 11.1 Hz), 3.83 (d, 1 H, H-5b,  $J_{5b,5a}$  = 11.1 Hz), 1.10 (s, 9 H, *t*-Bu); <sup>13</sup>C NMR (100 MHz, CDCl<sub>3</sub>);  $\delta$  19.4, 27.0, 64.3, 80.7, 82.4, 98.0, 107.7, 116.4, 116.7, 119.7, 125.5, 126.3, 127.8, 129.2, 129.5, 129.6, 129.8, 129.9, 132.4, 132.7, 135.4, 135.5, 135.8; <sup>2</sup>H NMR (400 MHz, THF);  $\delta$  4.54 (br s, 1 <sup>2</sup>H, <sup>2</sup>H -4); HRMS (FAB) calcd for C<sub>35</sub>H<sub>34</sub>DFO<sub>6</sub>SiNa 622.2147, found 621.2154 (MNa+).

**2,3-O-Endo-(benzylidene)-5-O-(tert-butyldiphenylsilyl)-1-O-(3-fluorobenzoyl)- $\beta$ -L-[4-<sup>2</sup>H]lyxose (5b).** <sup>1</sup>H NMR (400 MHz, CDCl<sub>3</sub>);  $\delta$  7.70-7.13 (m, 19 H, aromatic), 6.26 (d, 1 H, H-1,  $J_{1,2}$  = 4.0 Hz), 6.03 (s, 1 H, benzyl), 5.02 (dd, 1 H, H-2,  $J_{2,3}$  = 6.4 Hz,  $J_{2,1}$  = 4.0 Hz), 4.99 (d, 1 H, H-3,  $J_{3,2}$  = 6.4), 4.18 (d, 1 H, H-5a,  $J_{5a,5b}$  = 10.3 Hz), 4.03 (d, 1 H, H-5b,  $J_{5b,5a}$  = 11.2 Hz), 1.04 (s, 9 H, *t*-Bu); <sup>13</sup>C NMR (100 MHz, CDCl<sub>3</sub>);  $\delta$  19.4, 26.9, 62.3, 80.1, 80.5, 96.7, 107.5, 116.4, 116.6, 119.8, 120.0, 125.4, 126.4, 127.5, 127.5, 127.9, 129.1, 129.5, 129.5, 131.5, 133.1, 133.2, 135.4, 135.5, 135.9; <sup>2</sup>H NMR (400 MHz, THF);  $\delta$  4.30 (br s, 1 <sup>2</sup>H, <sup>2</sup>H -4); HRMS (FAB) calcd for C<sub>35</sub>H<sub>34</sub>DFO<sub>6</sub>SiNa 622.2147, found 622.2143 (MNa+).

**2,3-O-Endo-([2-<sup>2</sup>H]benzylidene)-5-O-(tert-butyldiphenylsilyl)-1-O-(3-fluorobenzoyl)- $\beta$ -D-ribose (6).** <sup>1</sup>H NMR (400 MHz, CDCl<sub>3</sub>);  $\delta$  7.70-7.14 (m, 18 H, aromatic), 6.58 (d, 1 H, H-1,  $J_{1,2}$  = 4.5 Hz), 6.07 (s, 1 H, benzyl), 5.11 (dd, 1 H, H-2,  $J_{2,3}$  = 6.7 Hz,  $J_{2,1}$  = 4.5 Hz), 5.00 (dd, 1 H, H-3,  $J_{3,2}$  = 6.7 Hz,  $J_{3,4}$  = 1.1 Hz), 4.64 (m, 1 H, H-4), 3.90 (d, 1 H, H-5a,  $J_{5a,4}$  = 2.4 Hz,  $J_{5a,5b}$  = 11.1 Hz), 3.83 (d, 1 H, H-5b,  $J_{5b,4}$  = 2.1 Hz,  $J_{5b,5a}$  = 11.1 Hz), 1.10 (s, 9 H, *t*-Bu); <sup>2</sup>H NMR (400 MHz, THF);  $\delta$  7.45 (br s, 1 <sup>2</sup>H, aromatic).

**2,3-O-Endo-(benzylidene)-5-O-(tert-butyldiphenylsilyl)-1-O-(3-fluorobenzoyl)- $\beta$ -D-ribose (7).** <sup>1</sup>H NMR (400 MHz, CDCl<sub>3</sub>);  $\delta$  7.70-7.14 (m, 19 H, aromatic), 6.58 (d, 1 H, H-1,  $J_{1,2}$  = 4.5 Hz), 6.07 (s, 1 H, benzyl), 5.11 (dd, 1 H, H-2,  $J_{2,3}$  = 6.7 Hz,  $J_{2,1}$  = 4.5 Hz), 5.00 (dd, 1 H, H-3,  $J_{3,2}$  = 6.7 Hz,  $J_{3,4}$  = 1.1 Hz), 4.64 (m, 1 H, H-4), 3.90 (d, 1 H, H-5a,  $J_{5a,4}$  = 2.4 Hz,  $J_{5a,5b}$  = 11.1 Hz), 3.83 (d, 1 H, H-5b,  $J_{5b,4}$  = 2.1 Hz,  $J_{5b,5a}$  = 11.1 Hz), 1.10 (s, 9 H, *t*-Bu).

**2,3-O-Endo-(benzylidene)-5-O-(tert-butyldiphenylsilyl)-1-O-(3-fluorobenzoyl)- $\beta$ -L-lyxose (5b').** Compound **5b'** was obtained from **4** with Bu<sub>3</sub>SnH instead of Bu<sub>3</sub>SnD as described for the synthesis of **5b**: <sup>1</sup>H NMR (400 MHz, CDCl<sub>3</sub>);  $\delta$  7.70-7.13 (m, 19 H, aromatic), 6.26 (d, 1 H, H-1,  $J_{1,2}$  = 4.0 Hz), 6.03 (s, 1 H, benzyl), 5.02 (dd, 1 H, H-2,  $J_{2,3}$  = 6.4 Hz,  $J_{2,1}$  = 4.0 Hz), 4.99 (dd, 1 H, H-3,  $J_{3,2}$  = 6.4,  $J_{3,4}$  = 4.3 Hz), 4.35 (ddd, 1 H, H-4,  $J_{4,3}$  = 4.3 Hz,  $J_{4,5a}$  =  $J_{4,5b}$  = 6.6 Hz), 4.18 (dd, 1 H, H-5a,  $J_{5a,4}$  = 6.6 Hz,  $J_{5a,5b}$  = 10.3 Hz), 4.03 (dd, 1 H, H-5b,  $J_{5b,4}$  = 6.6 Hz,  $J_{5b,5a}$  = 11.2 Hz), 1.04 (s, 9 H, *t*-Bu); <sup>13</sup>C NMR (100 MHz, CDCl<sub>3</sub>);  $\delta$  19.1, 26.7, 62.2, 79.5, 80.4, 96.6, 107.4, 116.31, 125.3, 126.3, 127.4, 127.4, 127.8, 129.0, 129.4, 133.0, 135.4; HRMS (FAB) calcd for C<sub>35</sub>H<sub>35</sub>FO<sub>6</sub>SiNa 621.2085, found 621.2097 (MNa+).

## General Procedure for the Intramolecular C–C Bond Formation with the Substrate **9**.

**Method A.** A mixture of **9** (67 mg, 0.1 mmol), Bu<sub>3</sub>SnH (81  $\mu$ L, 0.30 mmol), and AIBN (10 mg, 0.060 mmol, entries 1-4) or Et<sub>3</sub>B (1.0 M hexane solution, 100  $\mu$ L, 0.10 mmol, entry 5) was refluxed under argon



(entries 1-4) or stirred at room temperature under atmosphere (entry 5) until **9** disappeared on TLC. In the case of entry 5, air (3 mL) was bubbled into the reaction mixture at the beginning of stirring. The solvent was evaporated, and the residue was partitioned between hexane and MeCN, and the MeCN layer was evaporated. A mixture of the residue, KHF<sub>2</sub> (0.80 mmol) and *m*-CPBA (0.80 mmol) in DMF (1 mL) was stirred at 50 °C for 2.5 h, and then aqueous saturated Na<sub>2</sub>S<sub>2</sub>O<sub>3</sub> was added. The resulting mixture was partitioned between AcOEt and H<sub>2</sub>O, and the organic layer was washed with brine, dried (Na<sub>2</sub>SO<sub>4</sub>) and evaporated. The residue was purified by silica gel column chromatography (AcOEt/hexane, 1:3 then 1:1) to give **10**, **11** and **12** as an oil, respectively. **Method B.** To a refluxing solution of **9** (67 mg, 0.1 mmol) in benzene or chlorobenzene (10 mL) added a solution of Bu<sub>3</sub>SnH (81  $\mu$ L, 0.30 mmol) and AIBN (10 mg, 0.060 mmol) in the same solvent (6 mL) slowly over 6 h. The resulting mixture was treated as described in the above Method A.

**2,3-*O*-Endo-(benzylidene)-1-*O*-(3-fluorobenzoyl)-4-hydroxymethyl-5-methyl- $\beta$ -D-ribose (**10**).**

<sup>1</sup>H NMR (270 MHz, CDCl<sub>3</sub>) for a diastereomer at the 5-position  $\delta$  7.58-7.17 (m, 9 H, aromatic), 6.55 (d, 1 H, H-1, *J*<sub>1,2</sub> = 4.7 Hz), 6.10 (s, 1 H, benzyl), 5.10-5.00 (m, 2 H, H-2,3), 4.12 (m, 1 H, H-2, -Si-CH-CH<sub>3</sub>), 4.11 (d, 1 H, H-5a, *J*<sub>5a,5b</sub> = 12.3 Hz), 4.02 (d, 1 H, H-5b, *J*<sub>5b,5a</sub> = 12.3 Hz), 2.6-2.2 (br s, OH), 1.39 (d, 3 H, -CH<sub>3</sub>, *J* = 6.4 Hz); for the other diastereomer at the 5-position  $\delta$  7.58-7.17 (m, 9 H, aromatic), 6.51 (d, 1 H, H-1, *J*<sub>1,2</sub> = 3.5 Hz), 6.10 (s, 1 H, benzyl), 5.10-5.00 (m, 2 H, H-2,3), 4.28 (d, 1 H, H-5a, *J*<sub>5a,5b</sub> = 11.7 Hz), 4.22 (m, 1 H, H-2, -Si-CH-CH<sub>3</sub>), 3.83 (d, 1 H, H-5b, *J*<sub>5b,5a</sub> = 11.7 Hz), 2.6-2.2 (br s, OH), 1.32 (d, 3 H, -CH<sub>3</sub>, *J* = 6.4 Hz); HRMS (FAB) calcd for C<sub>21</sub>H<sub>21</sub>FO<sub>7</sub>Na 427.1169, found 427.1176 (MNa<sup>+</sup>).

**2,3-*O*-Endo-(benzylidene)-5-deoxy-1-*O*-(3-fluorobenzoyl)-4-hydroxymethyl- $\beta$ -L-lyxo-hexofuranose (**11**).**

<sup>1</sup>H NMR (270 MHz, CDCl<sub>3</sub>)  $\delta$  7.57-7.13 (m, 9 H, aromatic), 6.47 (d, 1 H, H-1, *J*<sub>1,2</sub> = 4.6 Hz), 6.08 (s, 1 H, benzyl), 5.14 (dd, 1 H, H-2, *J*<sub>2,3</sub> = 7.3, *J*<sub>2,1</sub> = 4.6 Hz), 4.88 (d, 1 H, H-3, *J*<sub>3,2</sub> = 7.3 Hz), 4.15 (d, 1 H, H-5a, *J*<sub>5a,5b</sub> = 11.9 Hz), 3.94 (d, 1 H, H-5b, *J*<sub>5b,5a</sub> = 11.9 Hz), 3.90 (t, 2 H, -CH<sub>2</sub>-CH<sub>2</sub>-OH, *J* = 5.3 Hz), 2.66 (br s, 1 H, -OH), 2.17-1.98 (m, 2 H, -CH<sub>2</sub>-CH<sub>2</sub>-OH), 1.25 (m, 1 H, -OH); <sup>13</sup>C NMR (70 MHz, CDCl<sub>3</sub>); 38.5, 58.2, 64.4, 80.8, 85.6, 86.7, 96.7, 108.3, 116.4, 116.7, 120.0, 120.3, 125.5, 125.5, 126.3, 128.1, 129.5, 129.8, 129.9, 135.4; HRMS (FAB) calcd for C<sub>21</sub>H<sub>21</sub>FO<sub>7</sub>Na 427.1169, found 427.1165 (MNa<sup>+</sup>).

**2,3-*O*-Endo-(benzylidene)-1-*O*-(3-fluorobenzoyl)- $\beta$ -D-ribose (**12**).** <sup>1</sup>H NMR (400 MHz, CDCl<sub>3</sub>)  $\delta$  7.61-7.16 (m, 9 H, aromatic), 6.54 (d, 1 H, H-1, *J*<sub>1,2</sub> = 4.4 Hz), 6.11 (s, 1 H, benzyl), 5.04 (dd, 1 H, H-2, *J*<sub>2,3</sub> = 7.3, *J*<sub>2,1</sub> = 4.4 Hz), 4.94 (dd, 1 H, H-3, *J*<sub>3,2</sub> = 7.3, *J*<sub>3,4</sub> = 2.9 Hz), 4.64 (m, 1 H, H-4), 3.97 (dd, 1 H, H-5a, *J*<sub>5a,4</sub> = 2.9 Hz, *J*<sub>5a,5b</sub> = 12.3 Hz), 3.84 (dd, 1 H, H-5b, *J*<sub>5b,4</sub> = 3.2 Hz, *J*<sub>5b,5a</sub> = 12.3 Hz), 1.25 (s, 1 H, OH); HRMS (FAB) calcd for C<sub>19</sub>H<sub>17</sub>FO<sub>6</sub>Na 383.0907, found 383.0898 (MNa<sup>+</sup>).

**(5R or S)-5-*O*-Acetyl-4-acetoxymethyl-2,3-*O*-endo-(benzylidene)-1-*O*-(3-fluorobenzoyl)-5-methyl- $\beta$ -D-ribose (**10a,b**).** A mixture of **10** (6.2 mg, 0.015 mmol), DMAP (0.4 mg, 0.03 mmol) and Ac<sub>2</sub>O (3.2 mL, 0.034 mmol) in pyridine (0.15 mL) was stirred at room temperature

for 30 min, and then MeOH was added. The resulting mixture was partitioned between AcOEt and H<sub>2</sub>O, and the organic layer was washed with brine, dried (Na<sub>2</sub>SO<sub>4</sub>) and evaporated. The residue was purified by silica gel preparative TLC (AcOEt/hexane, 3:7) to give **10a** (higher R<sub>f</sub>, 2.1 mg, 28%) and **10b** (lower R<sub>f</sub>, 1.3 mg, 17%) as an oil, respectively. **10a**: <sup>1</sup>H NMR (270 MHz, CDCl<sub>3</sub>)  $\delta$  7.53-7.12 (m, 9 H, aromatic), 6.50 (d, 1 H, H-1,  $J_{1,2}$  = 4.6 Hz), 6.05 (s, 1 H, benzyl), 5.32-5.25 (m, 1 H, -Si-CH-CH<sub>3</sub>), 5.04 (dd, 1 H, H-2,  $J_{2,3}$  = 6.6,  $J_{2,1}$  = 4.6 Hz), 4.80 (d, 1 H, H-3,  $J_{3,2}$  = 6.6 Hz), 4.66 (d, 1 H, H-5a,  $J_{5a,5b}$  = 11.2 Hz), 4.34 (d, 1 H, H-5b,  $J_{5b,5a}$  = 11.9 Hz), 2.15 (s, 3 H, Ac), 2.10 (s, 3 H, Ac), 1.32 (d, 3 H, -CH<sub>3</sub>,  $J$  = 5.9 Hz); HRMS (FAB) calcd for C<sub>25</sub>H<sub>25</sub>FO<sub>9</sub>Na 511.1380, found 511.1393 (MNa<sup>+</sup>). **10b**: <sup>1</sup>H NMR (270 MHz, CDCl<sub>3</sub>)  $\delta$  7.55-7.07 (m, 9 H, aromatic), 6.48 (d, 1 H, H-1,  $J_{1,2}$  = 4.6 Hz), 6.08 (s, 1 H, benzyl), 5.34-5.26 (m, 1 H, -Si-CH-CH<sub>3</sub>), 5.08 (dd, 1 H, H-2,  $J_{2,3}$  = 6.6,  $J_{2,1}$  = 4.6 Hz), 4.97 (d, 1 H, H-3,  $J_{3,2}$  = 6.6 Hz), 4.80 (d, 1 H, H-5a,  $J_{5a,5b}$  = 12.5 Hz), 4.41 (d, 1 H, H-5b,  $J_{5b,5a}$  = 13.1 Hz), 2.12 (s, 6 H, Ac  $\times$  2), 1.40 (d, 3 H, -CH<sub>3</sub>,  $J$  = 6.6 Hz); HRMS (FAB) calcd for C<sub>25</sub>H<sub>25</sub>FO<sub>9</sub>Na 511.1380, found 511.1382 (MNa<sup>+</sup>).

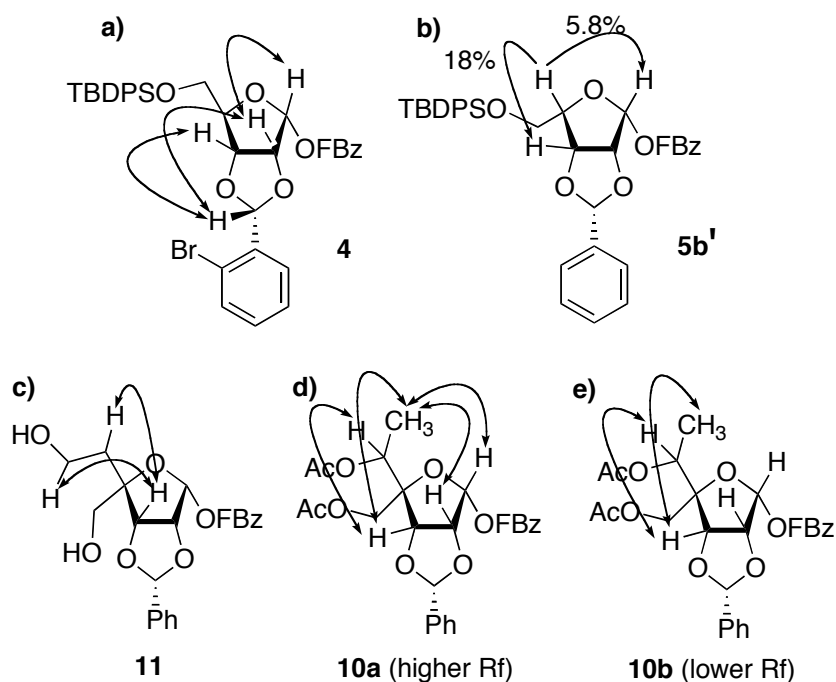

**Figure S1.** NOE and NOESY data of key compounds. The stereochemistry at the 4-position of the deuterium-labeled products **5a** and **5b** was determined based on the NOE experiments of the corresponding unlabeled compound **5b'** (b). After conversion of **10** into the corresponding acetates **10a** and **10b**, their stereochemistries were determined by NOESY data (d and e).

[illegible]

Chemical structure of compound **4** is shown in the inset. The structure is a 2,3:5,6-di-O-isopropylidene-4-O-benzoyl-beta-D-glucopyranoside derivative, with a TBDPSO group at C1 and a bromophenyl group at C2.

The <sup>13</sup>C NMR spectrum (CDCl<sub>3</sub>) shows the following chemical shifts (ppm):

| Chemical Shift (ppm) |
|----------------------|
| 163.82               |
| 163.33               |
| 160.88               |
| 135.47               |
| 134.53               |
| 134.53               |
| 132.65               |
| 132.52               |
| 132.27               |
| 132.20               |
| 129.87               |
| 129.83               |
| 129.68               |
| 129.61               |
| 128.71               |
| 127.78               |
| 127.01               |
| 125.57               |
| 125.57               |
| 122.76               |
| 120.10               |
| 119.89               |
| 116.75               |
| 116.52               |
| 106.34               |
| 97.90                |
| 83.02                |
| 82.65                |
| 82.65                |
| 77.32                |
| 77.32                |
| 77.00                |
| 76.68                |
| 64.51                |
| 26.99                |
| 19.35                |
| 0.19                 |

NAT1-71-2 (400)

C:\Documents and Settings\薬化\My Documents\NMRデータ\さかぐち\U01LC71Y.ALS

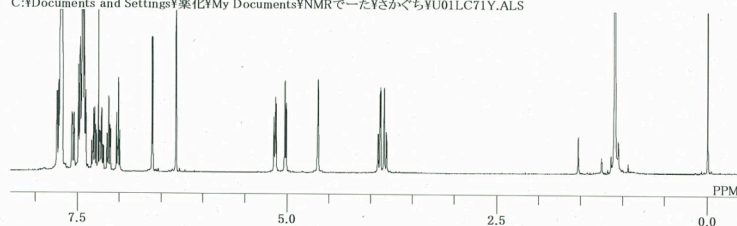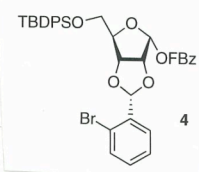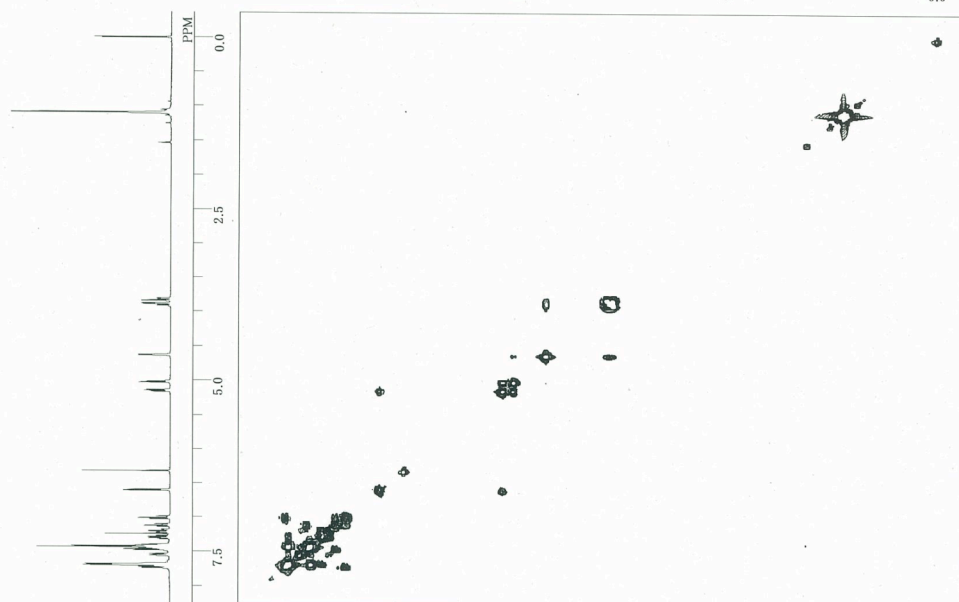

NAT2-64-2(inversion-D,400)

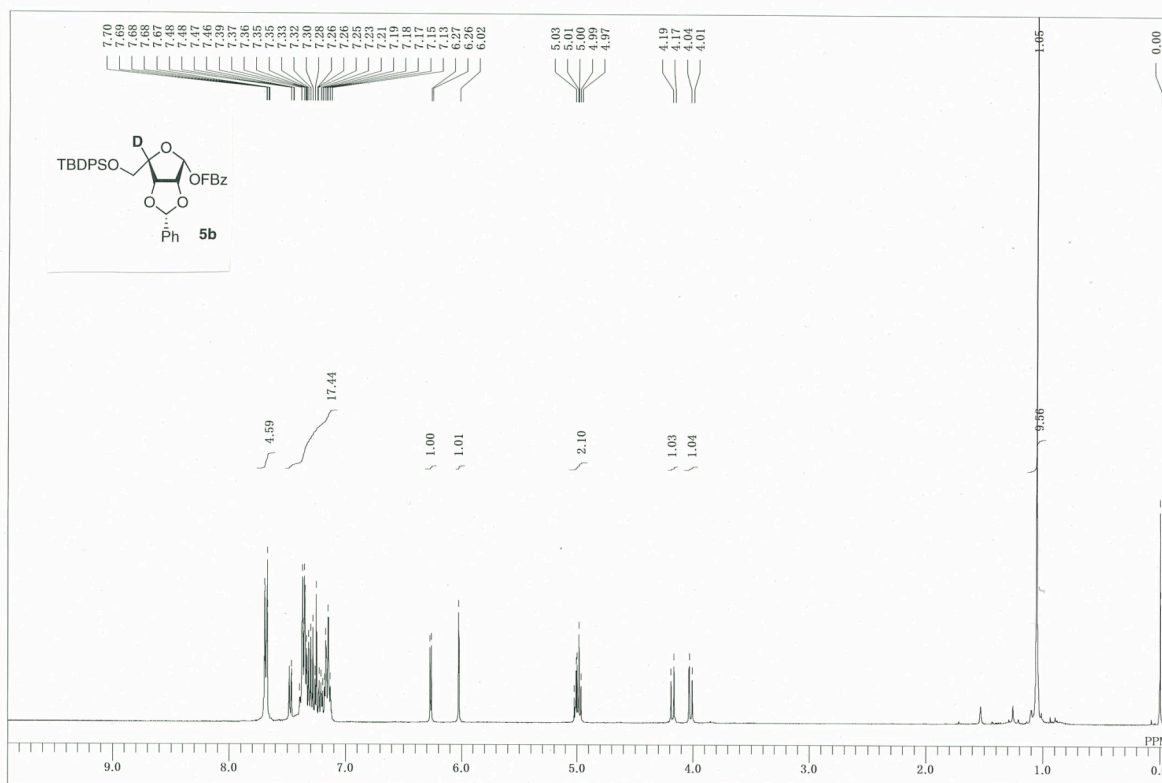

~~NAT2-64-1 (retention-D, 400)~~ NAT2-64-2 (inversion-D, 400)

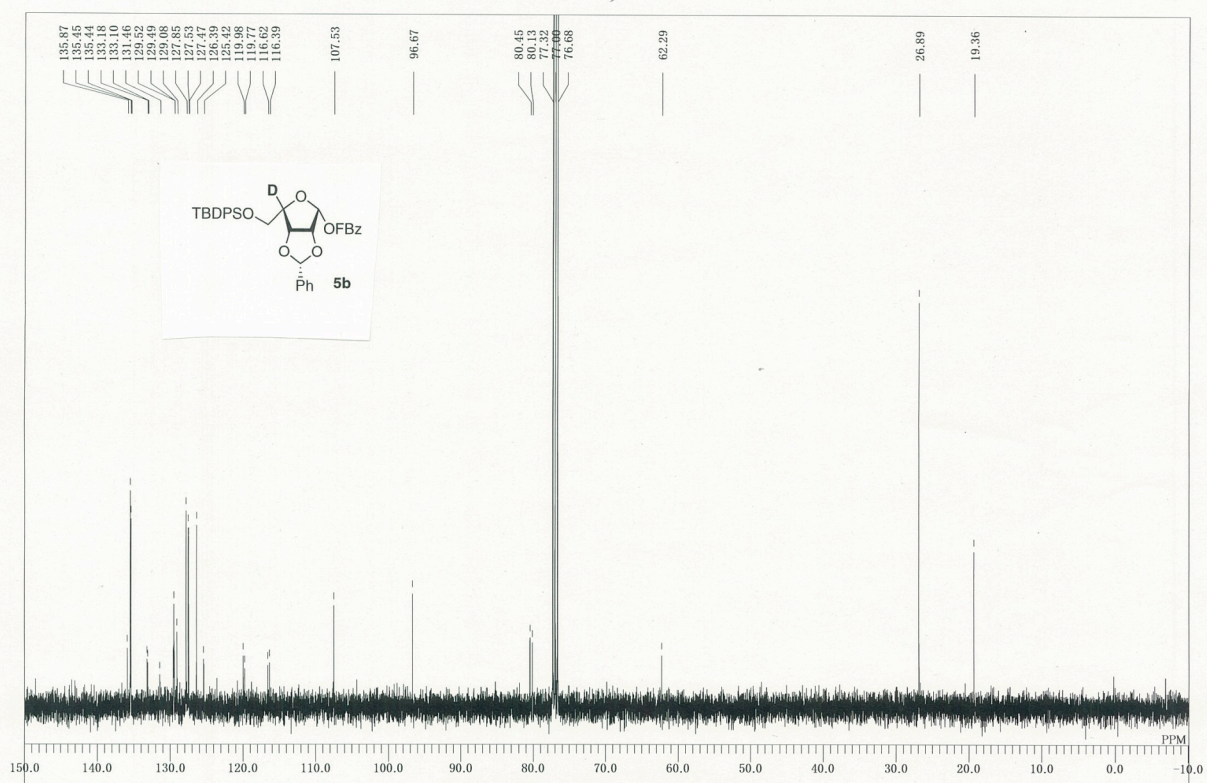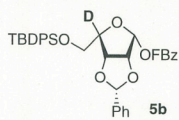

NAT2-64-1 (retention-D, 400)

C:\Documents and Settings\薬化\My Documents\NMRで一た\さかぐち\U02LC64\ALS

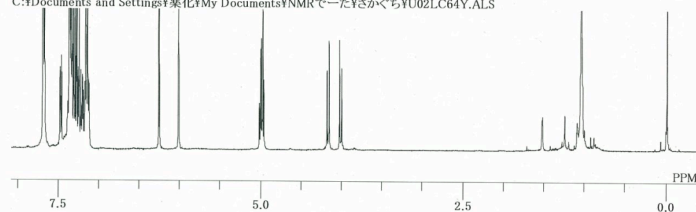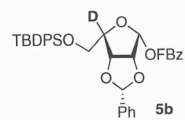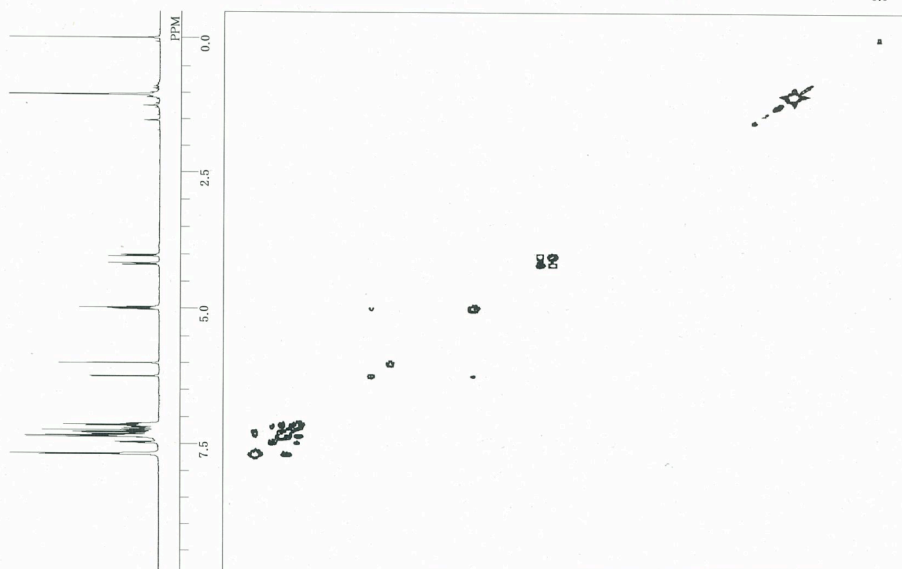



NAT2-41-1(400)

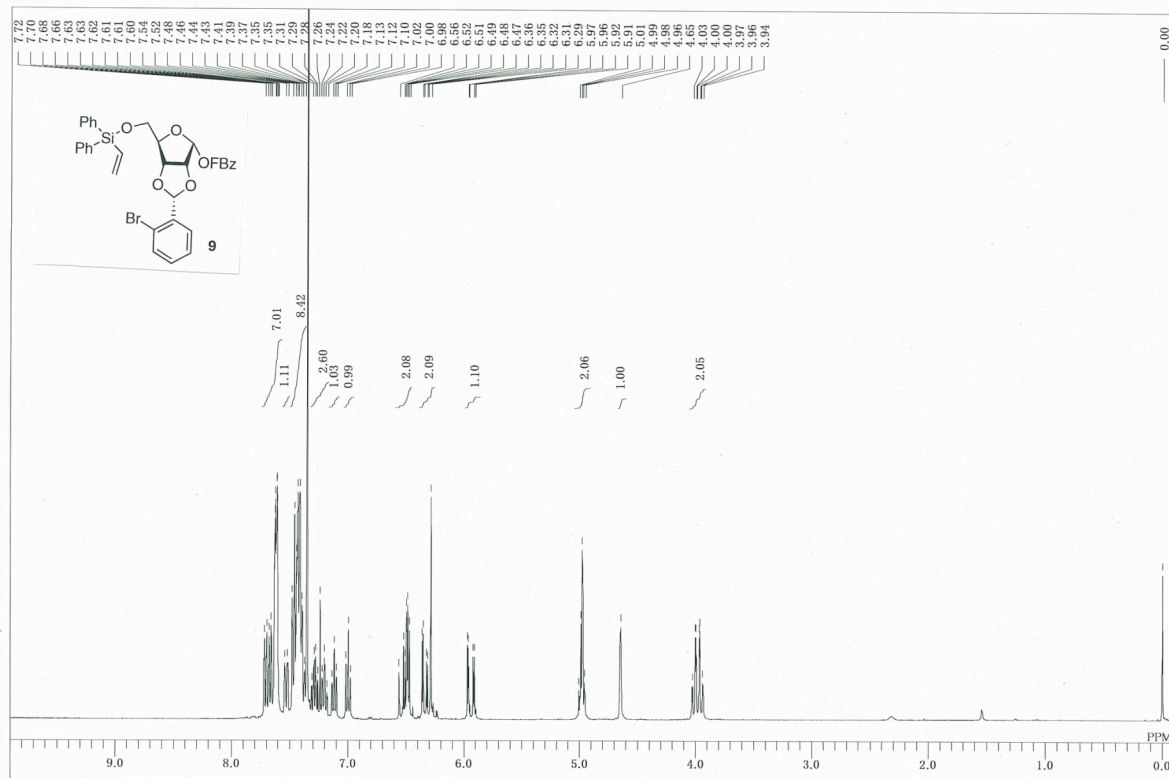

NAT2-41-1(400)

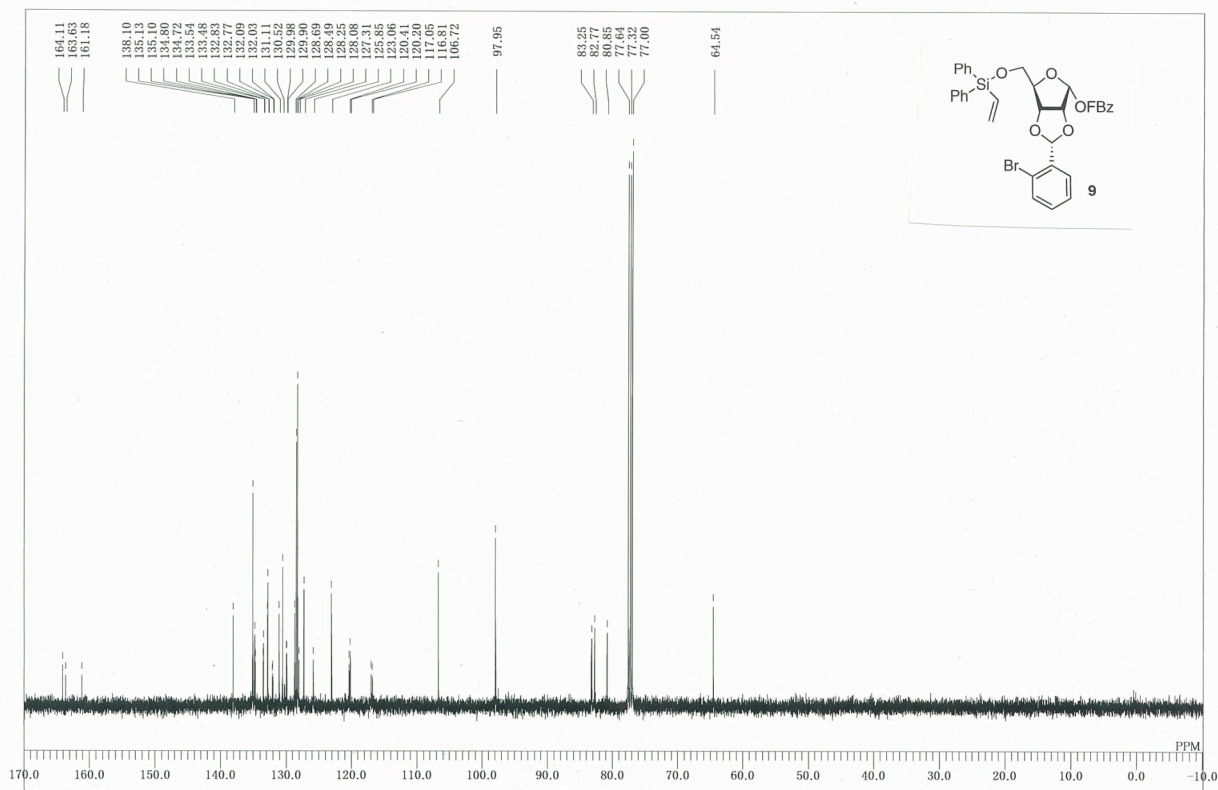

NAT2-41-1 (400)

C:\Documents and Settings\薬化学\My Documents\NMRデータ\YU02LC41Y.ALS

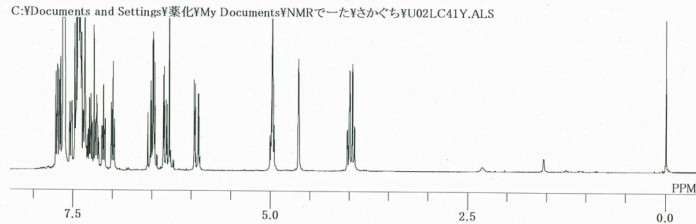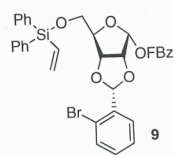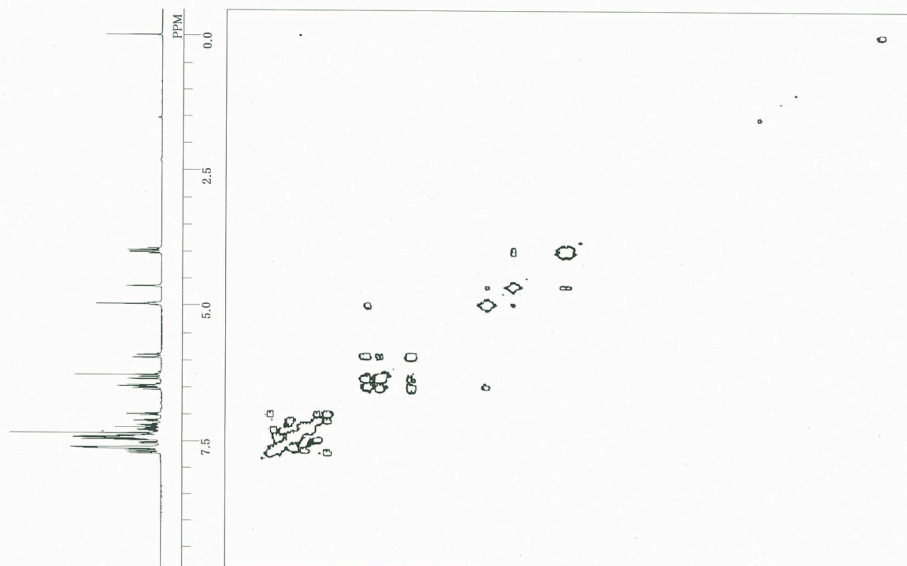

NAT2-54-1(400,cdd3)

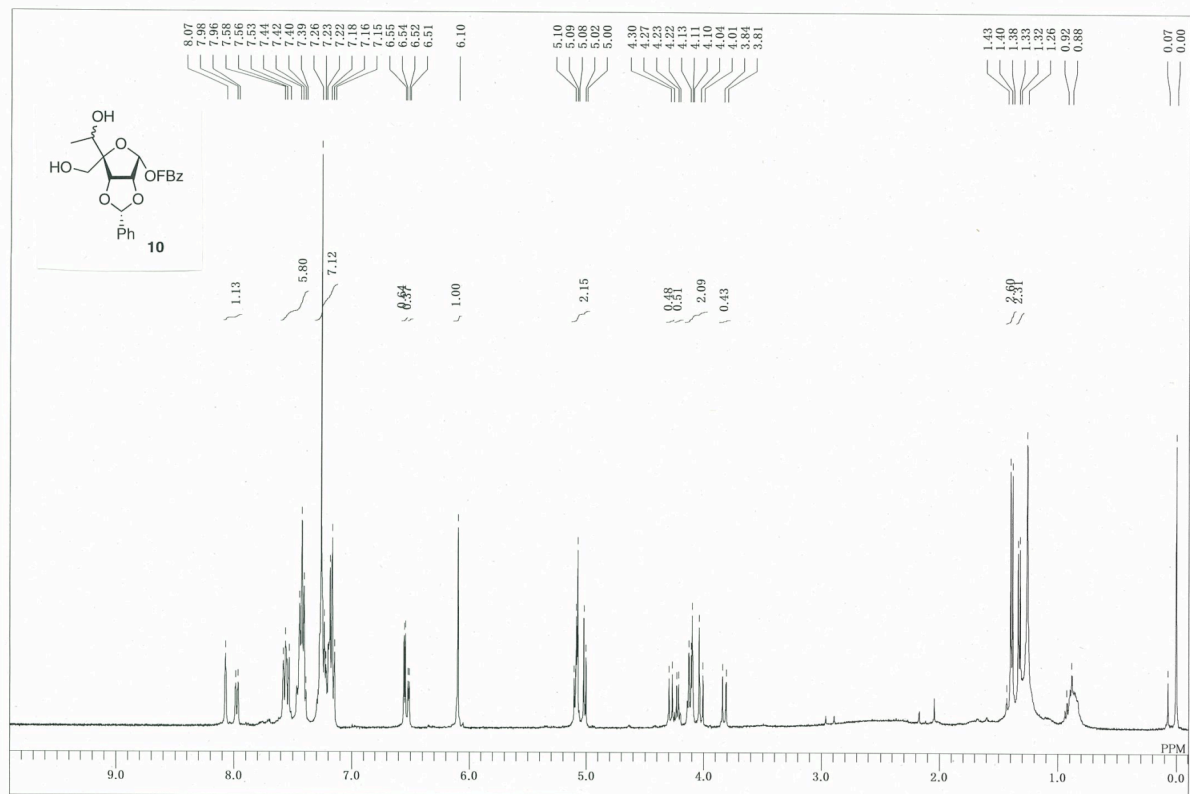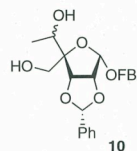

NAT2-71-2 (400, CDC13)

C:\Documents and Settings\Y薬化\My Documents\NMRでーた\Yさかぐち\Y2-68~YU02LC71D.ALS

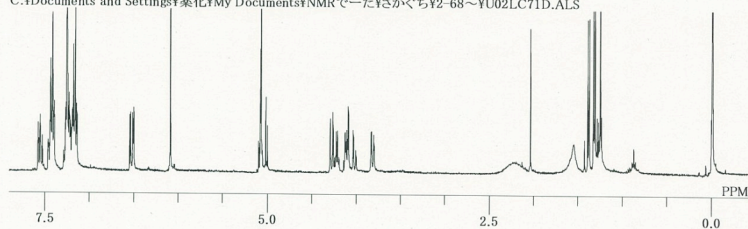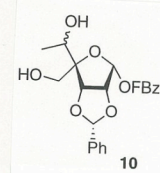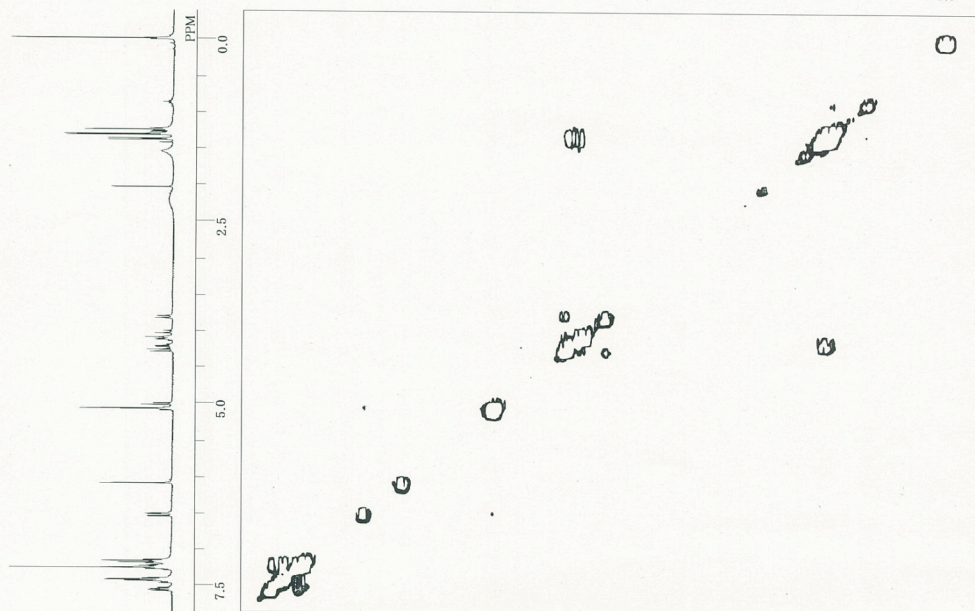

NAT2-86-3

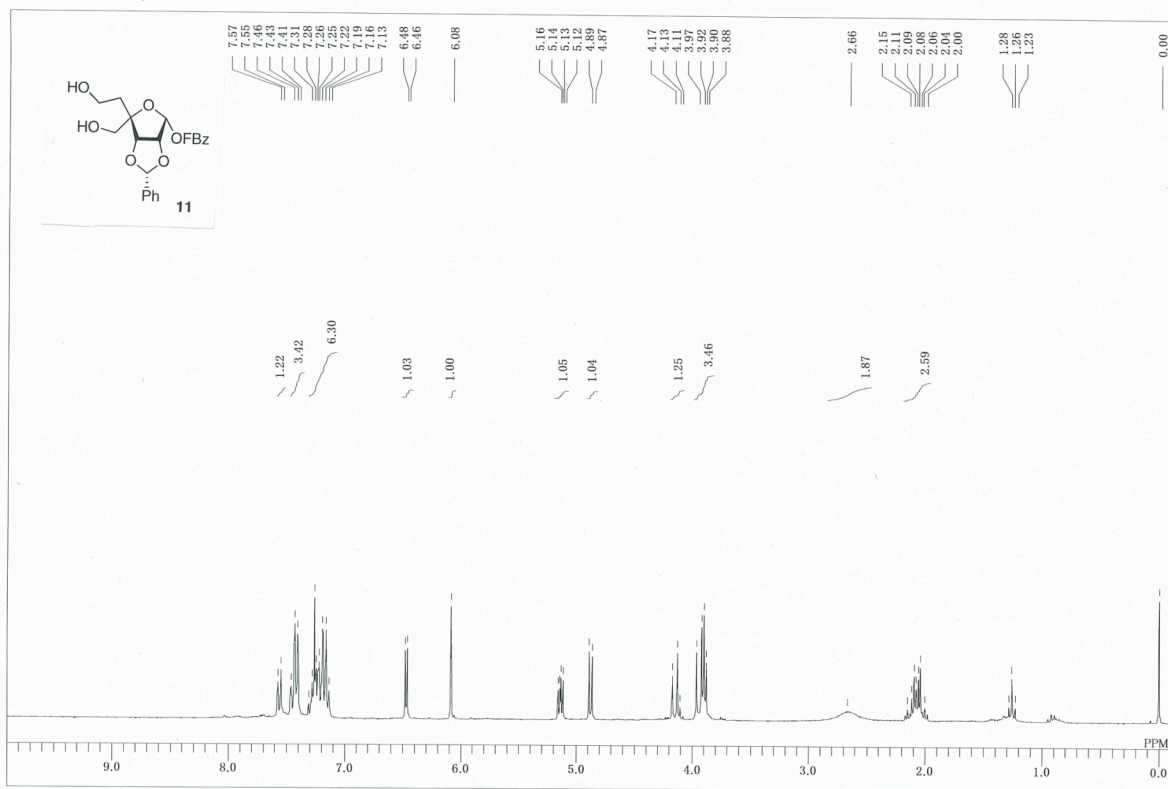



NAT2-86-3(13C)

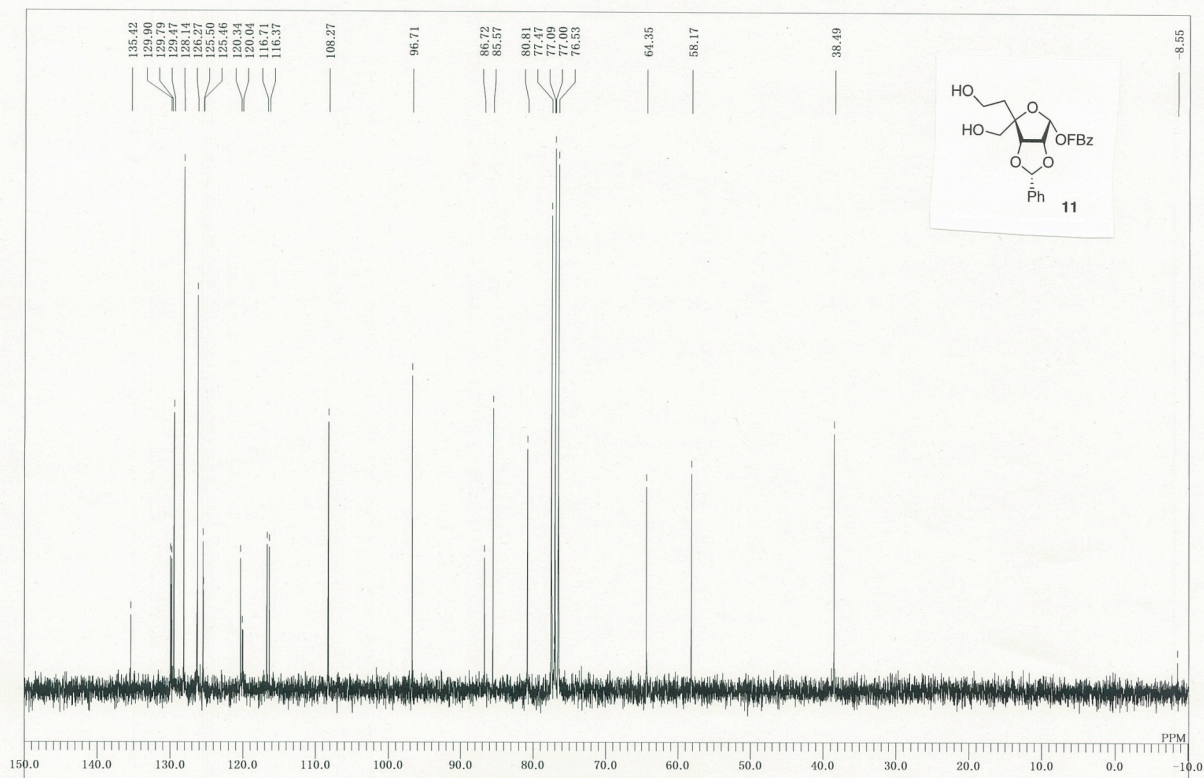

NAT2-25-4 (400, cosy)

C:\Documents and Settings\薬化\My Documents\YINMRでーた\さかぐち\薬化のときの\Yでさー\Y02LC25Y.ALS

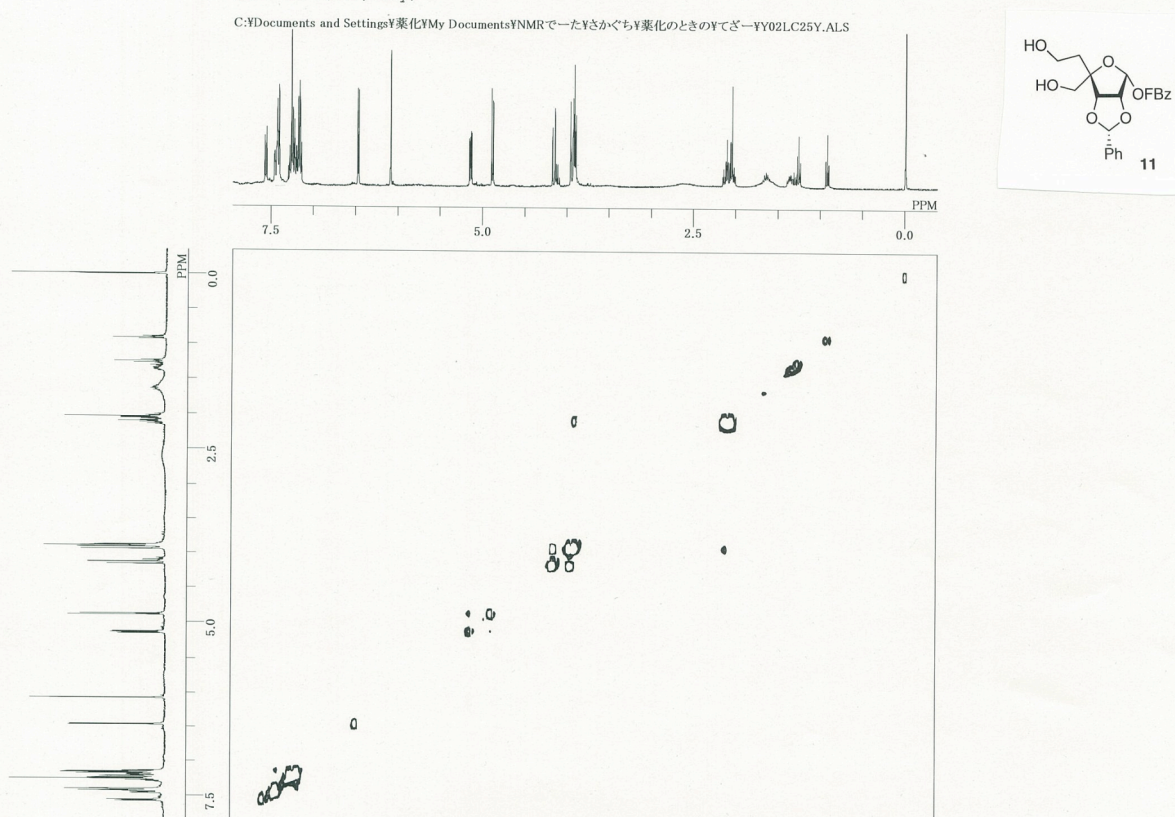

Supplement: Supplementary file 1 [file 4775698]
